# Supplementary material for: Up-conversion photoluminescence and temperature sensing properties of Er3+-doped Bi4Ti3O12 nanoparticles with good water-resistance performance
Source: Royal Society of Chemistry journal article supplement (doi:10.1039/c5ra24776d), 2016-01-01
Supplement: c5ra24776d1.pdf [file c5ra24776d1.pdf]

**Up-conversion photoluminescence and temperature sensing properties of Er<sup>3+</sup>-doped  
Bi<sub>4</sub>Ti<sub>3</sub>O<sub>12</sub> nanoparticles with good water-resistance performance**

T. Wei<sup>&†</sup>, T. B. Zhang<sup>&</sup>, Y. J. Ma<sup>&</sup>, Y. F. Xie<sup>&</sup>, C. Z. Zhao<sup>§</sup>, F. M. Yang<sup>&</sup>, H. Y. Xiao<sup>&</sup>, Y.  
Zhao<sup>&</sup>, H. Y. Yan<sup>&</sup>

<sup>&</sup>*College of Science, Civil Aviation University of China, Tianjin 300300, China*

<sup>§</sup>*School of Electronics and Information Engineering, Tianjin Polytechnics University, Tianjin  
300160, China*

**Supporting Information:**

**Supplemental Tables**

**Table S1.** Atomic coordinates, atomic occupancies and isotropic thermal parameters of the BiT-0 at room temperature

| Atom | Site | x       | y        | z           | 100U <sub>iso</sub> /Å <sup>2</sup> | Occupancy |
|------|------|---------|----------|-------------|-------------------------------------|-----------|
| Bi1  | 8 i  | 0(0)    | 0(0)     | 0.06747(8)  | 0.72(7)                             | 1         |
| Bi2  | 8 i  | 0(0)    | 0(0)     | 0.21059(7)  | 0.78(7)                             | 1         |
| Ti1  | 4 b  | 0(0)    | 0(0)     | 0.50(0)     | 1.25(52)                            | 1         |
| Ti2  | 8 i  | 0(0)    | 0(0)     | 0.36759(30) | 1.49(32)                            | 1         |
| O1   | 8 e  | 0.25(0) | 0.25(0)  | 0 (0)       | 4.66 (36)                           | 1         |
| O2   | 8 f  | 0.25(0) | 0.25 (0) | 0.25(0)     | 4.66 (36)                           | 1         |
| O3   | 8 i  | 0(0)    | 0(0)     | 0.4372(8)   | 4.66 (36)                           | 1         |
| O4   | 8 i  | 0(0)    | 0(0)     | 0.3270(8)   | 4.66 (36)                           | 1         |
| O5   | 16 j | 0.25(0) | 0.25(0)  | 0.1258(5)   | 4.66 (36)                           | 1         |

<sup>†</sup> Corresponding Author, E-mail: [weitong.nju@gmail.com](mailto:weitong.nju@gmail.com) or [weitong\\_nju@163.com](mailto:weitong_nju@163.com)

**Table S2.** Atomic coordinates, atomic occupancies and isotropic thermal parameters of the BiT-0.05 at room temperature

| Atom | Site | x       | y        | z           | $100U_{\text{iso}}/\text{\AA}^2$ | Occupancy |
|------|------|---------|----------|-------------|----------------------------------|-----------|
| Bi1  | 8 i  | 0(0)    | 0(0)     | 0.06755(8)  | 0.94(7)                          | 0.975     |
| Er1  | 8 i  | 0(0)    | 0(0)     | 0.06755(8)  | 0.94(7)                          | 0.025     |
| Bi2  | 8 i  | 0(0)    | 0(0)     | 0.21050(6)  | 1.18(7)                          | 1         |
| Ti1  | 4 b  | 0(0)    | 0(0)     | 0.50(0)     | 1.84 (55)                        | 1         |
| Ti2  | 8 i  | 0(0)    | 0(0)     | 0.36794(28) | 0.95 (29)                        | 1         |
| O1   | 8 e  | 0.25(0) | 0.25(0)  | 0 (0)       | 4.15 (35)                        | 1         |
| O2   | 8 f  | 0.25(0) | 0.25 (0) | 0.25(0)     | 4.15 (35)                        | 1         |
| O3   | 8 i  | 0(0)    | 0(0)     | 0.4400(7)   | 4.15 (35)                        | 1         |
| O4   | 8 i  | 0(0)    | 0(0)     | 0.3294(8)   | 4.15 (35)                        | 1         |
| O5   | 16 j | 0.25(0) | 0.25(0)  | 0.1269(5)   | 4.15 (35)                        | 1         |

**Table S3.** Atomic coordinates, atomic occupancies and isotropic thermal parameters of the BIT-0.2 at room temperature

| Atom | Site | x       | y        | z           | $100U_{\text{iso}}/\text{\AA}^2$ | Occupancy |
|------|------|---------|----------|-------------|----------------------------------|-----------|
| Bi1  | 8 i  | 0(0)    | 0(0)     | 0.06760(11) | 1.08 (9)                         | 0.90      |
| Er1  | 8 i  | 0(0)    | 0(0)     | 0.06760(11) | 1.08 (9)                         | 0.10      |
| Bi2  | 8 i  | 0(0)    | 0(0)     | 0.21032(8)  | 1.13 (9)                         | 1         |
| Ti1  | 4 b  | 0(0)    | 0(0)     | 0.50(0)     | 0.86 (64)                        | 1         |
| Ti2  | 8 i  | 0(0)    | 0(0)     | 0.36630(35) | 0.72 (38)                        | 1         |
| O1   | 8 e  | 0.25(0) | 0.25(0)  | 0 (0)       | 3.03 (38)                        | 1         |
| O2   | 8 f  | 0.25(0) | 0.25 (0) | 0.25(0)     | 3.03 (38)                        | 1         |
| O3   | 8 i  | 0(0)    | 0(0)     | 0.4390(8)   | 3.03 (38)                        | 1         |
| O4   | 8 i  | 0(0)    | 0(0)     | 0.3317(9)   | 3.03 (38)                        | 1         |
| O5   | 16 j | 0.25(0) | 0.25(0)  | 0.1244(6)   | 3.03 (38)                        | 1         |

## Supplemental Figures

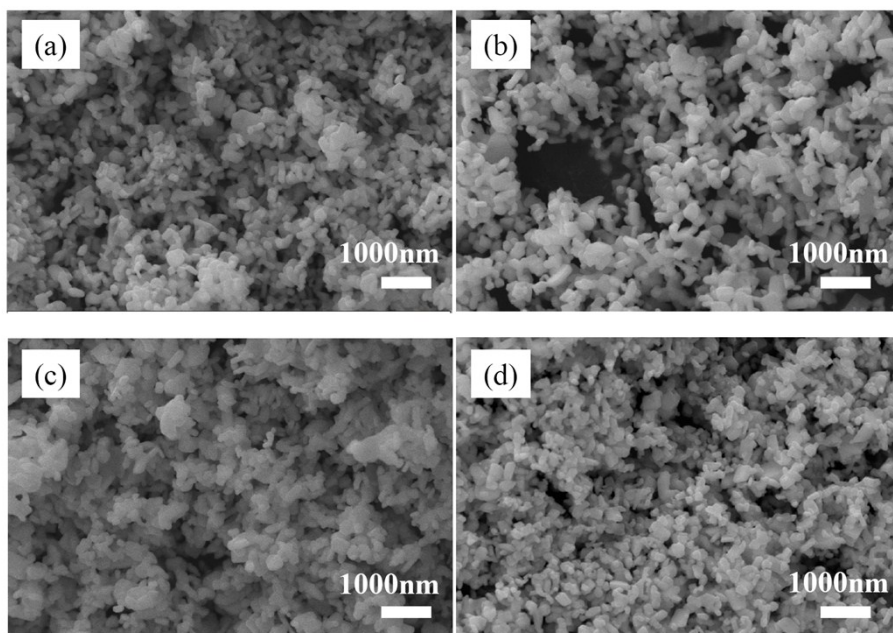

**Fig. S1.** (Color online) SEM micrographs of BiT-0.02 (a), BiT-0.05 (b), BiT-0.08 (c), BiT-0.15 (d).

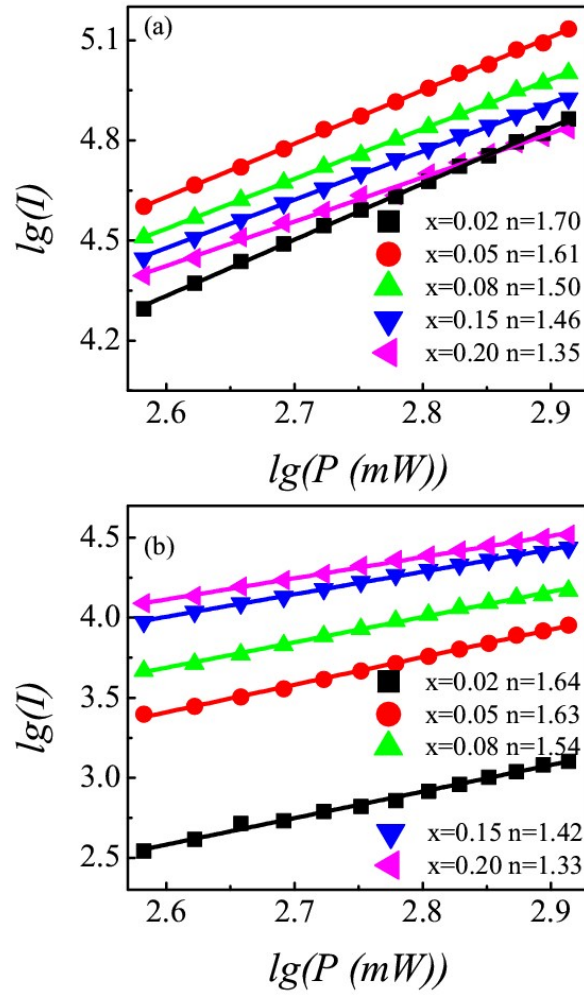

**Fig. S2.** (Color online) Dependence of UC green (a) and red (b) emission intensities on pumping power for BiT-x. The solid lines are the linear fitting results.
